# Supplementary material
Source: Springer Nature journal article supplement (https://www.springermedizin.de/resource/supplementary/13054_2003_2839_MOESM3_ESM.pdf/9719118)

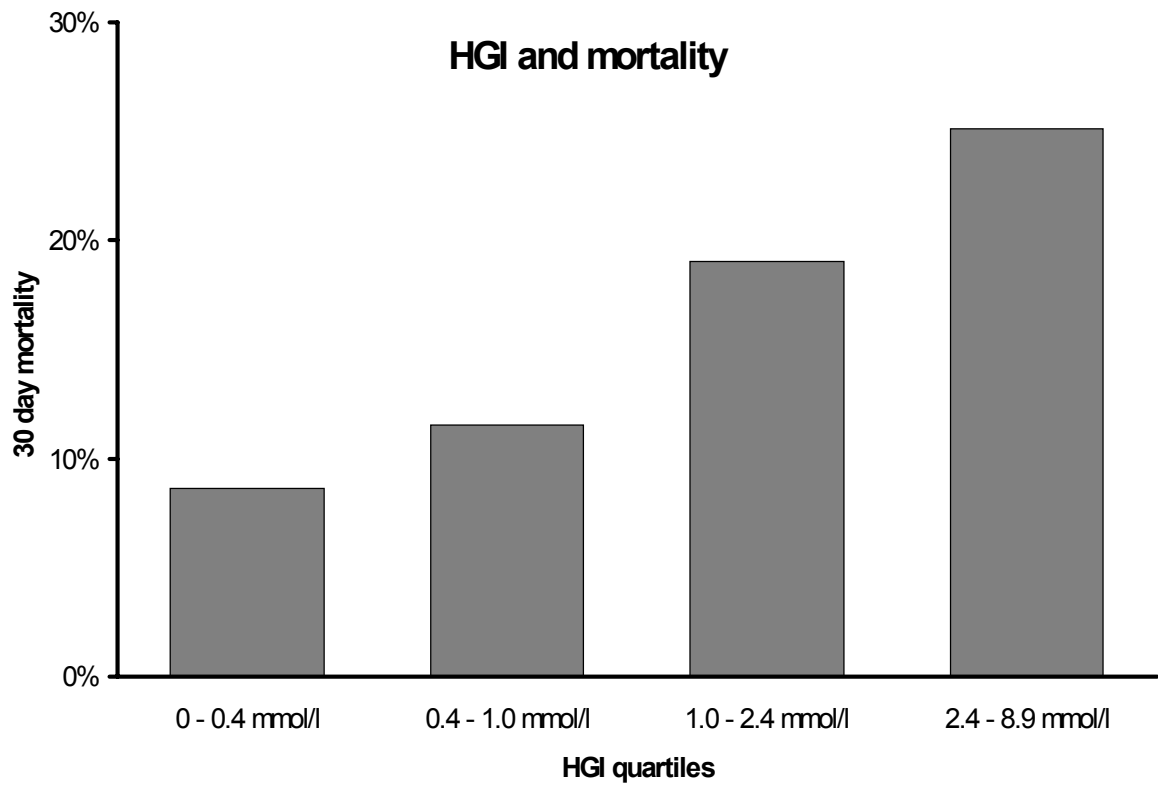

Supplement: MOESM3 [file 9719118]
